# Supplementary material for: Functional Outcomes Following Hip Replacement in Community-Dwelling Older Adults
Source: MDPI journal article supplement (doi:10.3390/jcm11175117), 2022-08-30
Supplement: s1 [file s1]

**Figure S1. Baseline and follow-up measures of self-reported physical and mental health function in participants with hip replacement and age- and sex-matched controls, data presented as mean (standard deviation)**

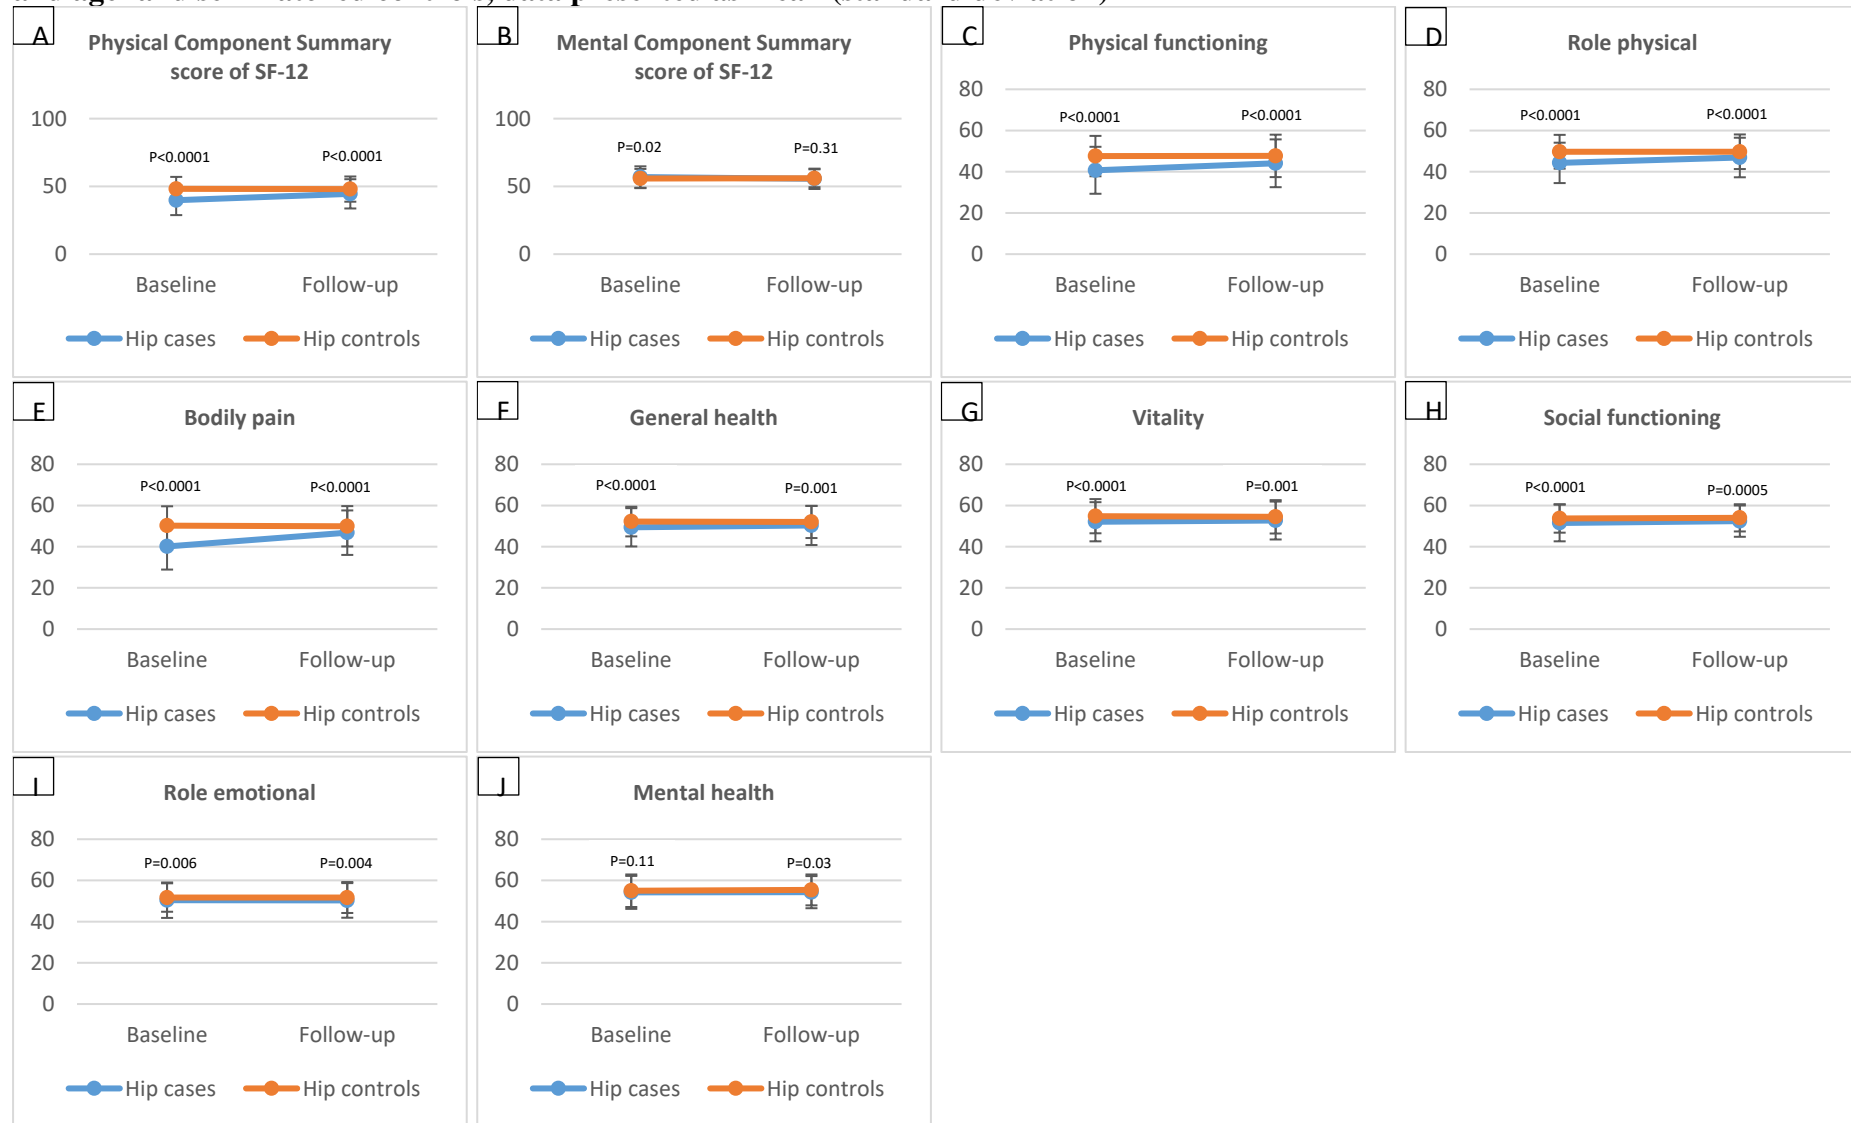

**Table S1. Baseline and follow-up measures of health status and gait speed by gender in participants with hip replacement and age- and sex-matched controls**

|                                 | Participants with hip replacement       |                        |                     | Age- and sex-matched controls          |                        |                     | Difference between groups  |                             |                          |
|---------------------------------|-----------------------------------------|------------------------|---------------------|----------------------------------------|------------------------|---------------------|----------------------------|-----------------------------|--------------------------|
|                                 | Baseline<br>(preoperative)<br>Mean (SD) | Follow-up<br>Mean (SD) | Change<br>Mean (SD) | Baseline<br>(study entry)<br>Mean (SD) | Follow-up<br>Mean (SD) | Change<br>Mean (SD) | Baseline<br>P <sup>c</sup> | Follow-up<br>P <sup>c</sup> | Change<br>P <sup>c</sup> |
| <b>Females</b>                  | <i>n=260</i>                            |                        |                     | <i>n=363</i>                           |                        |                     |                            |                             |                          |
| PCS                             | 37.9 (11.1)                             | 42.9 (11.4)            | 5.0 (10.7)          | 47.5 (9.1)                             | 46.7 (9.9)             | -0.8 (7.3)          | <0.0001                    | <0.0001                     | <0.0001                  |
| MCS                             | 56.9 (8.1)                              | 55.4 (7.9)             | -1.5 (8.7)          | 55.3 (7.6)                             | 55.8 (7.1)             | 0.5 (7.7)           | 0.01                       | 0.55                        | 0.003                    |
| Physical function               | 38.2 (11.3)                             | 41.2 (12.0)            | 3.0 (11.2)          | 46.0 (10.1)                            | 45.5 (10.8)            | -0.5 (8.7)          | <0.0001                    | <0.0001                     | <0.0001                  |
| Role physical                   | 42.8 (9.9)                              | 46.4 (9.7)             | 3.6 (10.2)          | 49.1 (8.6)                             | 49.3 (8.5)             | 0.2 (8.2)           | <0.0001                    | 0.0001                      | <0.0001                  |
| Bodily pain                     | 38.7 (11.5)                             | 45.9 (11.3)            | 7.1 (12.5)          | 49.5 (9.7)                             | 48.6 (10.6)            | -0.9 (9.7)          | <0.0001                    | 0.002                       | <0.0001                  |
| General health                  | 49.0 (9.7)                              | 49.7 (10.5)            | 0.7 (10.0)          | 52.3 (7.0)                             | 51.8 (7.7)             | -0.6 (6.9)          | <0.0001                    | 0.004                       | 0.07                     |
| Vitality                        | 51.2 (9.3)                              | 51.9 (9.3)             | 0.7 (9.2)           | 54.6 (8.5)                             | 54.2 (8.5)             | -0.4 (7.8)          | <0.0001                    | 0.001                       | 0.11                     |
| Social functioning              | 50.6 (9.5)                              | 51.7 (8.3)             | 1.0 (9.7)           | 53.5 (7.1)                             | 53.5 (7.0)             | -0.03 (7.6)         | <0.0001                    | 0.004                       | 0.12                     |
| Role emotional                  | 50.0 (9.0)                              | 49.5 (9.1)             | -0.6 (10.1)         | 50.9 (7.6)                             | 51.2 (7.7)             | 0.3 (8.2)           | 0.18                       | 0.01                        | 0.26                     |
| Mental health                   | 53.5 (8.0)                              | 53.9 (8.0)             | 0.4 (8.1)           | 53.7 (8.1)                             | 54.3 (7.7)             | 0.6 (8.4)           | 0.78                       | 0.50                        | 0.71                     |
| Gait speed (m/sec) <sup>a</sup> | 0.92 (0.26)                             | 0.89 (0.21)            | -0.02 (0.23)        | 1.03 (0.22)                            | 0.98 (0.23)            | -0.05 (0.18)        | <0.0001                    | <0.0001                     | 0.14                     |
| <b>Males</b>                    | <i>n=185</i>                            |                        |                     | <i>n=265</i>                           |                        |                     |                            |                             |                          |
| PCS                             | 42.5 (10.3)                             | 46.8 (9.4)             | 4.4 (10.2)          | 49.1 (8.3)                             | 49.8 (8.1)             | 0.6 (6.8)           | <0.0001                    | 0.0005                      | <0.0001                  |
| MCS                             | 57.0 (7.6)                              | 55.7 (6.9)             | -1.3 (7.5)          | 56.6 (6.3)                             | 56.3 (5.9)             | -0.3 (7.6)          | 0.53                       | 0.36                        | 0.18                     |
| Physical function               | 44.1 (10.7)                             | 48.2 (9.8)             | 4.1 (12.0)          | 49.8 (8.9)                             | 50.7 (8.7)             | 0.9 (8.2)           | <0.0001                    | 0.005                       | 0.001                    |
| Role physical                   | 46.4 (9.3)                              | 47.6 (9.4)             | 1.2 (10.8)          | 50.7 (7.5)                             | 50.4 (8.3)             | -0.3 (7.2)          | <0.0001                    | 0.001                       | 0.09                     |
| Bodily pain                     | 42.1 (10.4)                             | 48.2 (10.0)            | 6.1 (11.3)          | 51.2 (8.9)                             | 51.8 (8.4)             | 0.6 (9.0)           | <0.0001                    | <0.0001                     | <0.0001                  |
| General health                  | 50.1 (8.8)                              | 51.2 (7.8)             | 1.1 (8.6)           | 52.0 (7.4)                             | 52.4 (7.9)             | 0.4 (7.2)           | 0.01                       | 0.13                        | 0.32                     |
| Vitality                        | 53.4 (9.7)                              | 53.8 (8.8)             | 0.5 (10.1)          | 55.2 (8.0)                             | 54.9 (7.7)             | -0.3 (8.5)          | 0.03                       | 0.18                        | 0.34                     |
| Social functioning              | 52.7 (7.9)                              | 53.5 (6.4)             | 0.8 (8.7)           | 54.0 (6.7)                             | 54.7 (5.9)             | 0.7 (7.4)           | 0.08                       | 0.05                        | 0.92                     |
| Role emotional                  | 51.0 (7.9)                              | 51.5 (7.2)             | 0.5 (8.4)           | 52.8 (5.7)                             | 52.4 (7.2)             | -0.4 (7.8)          | 0.005                      | 0.18                        | 0.25                     |
| Mental health                   | 55.2 (7.9)                              | 55.0 (7.5)             | -0.2 (8.1)          | 56.8 (7.4)                             | 56.7 (6.9)             | -0.02 (8.8)         | 0.03                       | 0.01                        | 0.80                     |
| Gait speed (m/sec) <sup>b</sup> | 1.02 (0.23)                             | 1.02 (0.21)            | -0.002 (0.22)       | 1.09 (0.23)                            | 1.05 (0.21)            | -0.04 (0.19)        | 0.005                      | 0.19                        | 0.06                     |

SD: standard deviation; PCS: Physical component summary score of SF-12; MCS: Mental component summary score of SF-12

<sup>a</sup>n=190 for female participants with hip replacement and n=329 for female controls

<sup>b</sup>n=141 for male participants with hip replacement and n=245 for male controls

<sup>c</sup>For difference between participants with hip replacement and controls in each of the baseline and follow-up measures and their change from baseline to follow-up

**Table S2. Changes in health status and gait speed from baseline to follow-up by gender in participants with hip replacement and age- and sex-matched controls**

|                                 | Participants with hip replacement |        | Age- and sex-matched controls |        | Difference between groups |        |
|---------------------------------|-----------------------------------|--------|-------------------------------|--------|---------------------------|--------|
|                                 | Mean change (95% CI)              | P      | Mean change (95% CI)          | P      | Mean difference (95% CI)  | P      |
| <b>Females</b>                  | <i>n=256</i>                      |        | <i>n=361</i>                  |        |                           |        |
| PCS                             | 5.3 (4.1, 6.5)                    | <0.001 | -0.6 (-1.6, 0.4)              | 0.24   | 5.9 (4.4, 7.4)            | <0.001 |
| MCS                             | -1.7 (-2.8, -0.6)                 | 0.002  | 0.4 (-0.5, 1.3)               | 0.40   | -2.1 (-3.5, -0.7)         | 0.004  |
| Physical function               | 3.6 (2.3, 4.9)                    | <0.001 | -0.5 (-1.5, 0.6)              | 0.41   | 4.1 (2.4, 5.8)            | <0.001 |
| Role physical                   | 3.6 (2.4, 4.8)                    | <0.001 | 0.4 (-0.6, 1.3)               | 0.48   | 3.2 (1.7, 4.8)            | <0.001 |
| Bodily pain                     | 7.2 (5.8, 8.7)                    | <0.001 | -0.7 (-1.9, 0.6)              | 0.29   | 7.9 (6.0, 9.8)            | <0.001 |
| General health                  | 0.5 (-0.6, 1.6)                   | 0.36   | -0.5 (-1.5, 0.4)              | 0.26   | 1.0 (-0.4, 2.5)           | 0.15   |
| Vitality                        | 0.8 (-0.3, 1.9)                   | 0.14   | -0.4 (-1.3, 0.6)              | 0.43   | 1.2 (-0.3, 2.6)           | 0.11   |
| Social functioning              | 0.8 (-0.3, 1.8)                   | 0.15   | -0.2 (-1.1, 0.7)              | 0.69   | 1.0 (-0.4, 2.4)           | 0.18   |
| Role emotional                  | -0.5 (-1.7, 0.7)                  | 0.41   | 0.2 (-0.8, 1.2)               | 0.74   | -0.7 (-2.2, 0.9)          | 0.40   |
| Mental health                   | 0.2 (-0.8, 1.3)                   | 0.66   | 0.6 (-0.3, 1.6)               | 0.16   | -0.4 (-1.8, 1.0)          | 0.58   |
| Gait speed (m/sec) <sup>a</sup> | -0.02 (-0.06, 0.01)               | 0.11   | -0.05 (-0.07, -0.03)          | <0.001 | 0.03 (-0.01, 0.06)        | 0.19   |
| <b>Males</b>                    | <i>n=179</i>                      |        | <i>n=264</i>                  |        |                           |        |
| PCS                             | 4.4 (3.1, 5.7)                    | <0.001 | 0.7 (-0.3, 1.8)               | 0.18   | 3.7 (2.0, 5.4)            | <0.001 |
| MCS                             | -1.4 (-2.6, -0.2)                 | 0.02   | -0.2 (-1.1, 0.8)              | 0.72   | -1.3 (-2.8, 0.3)          | 0.11   |
| Physical function               | 4.2 (2.7, 5.8)                    | <0.001 | 1.0 (-0.2, 2.3)               | 0.10   | 3.2 (1.2, 5.2)            | 0.002  |
| Role physical                   | 1.1 (-0.3, 2.5)                   | 0.11   | -0.1 (-1.3, 1.0)              | 0.80   | 1.3 (-0.5, 3.1)           | 0.17   |
| Bodily pain                     | 6.0 (4.5, 7.5)                    | <0.001 | 0.5 (-0.7, 1.8)               | 0.39   | 5.5 (3.5, 7.4)            | <0.001 |
| General health                  | 1.1 (-0.1, 2.3)                   | 0.07   | 0.7 (-0.3, 1.6)               | 0.19   | 0.5 (-1.1, 2.0)           | 0.57   |
| Vitality                        | 0.6 (-0.8, 2.0)                   | 0.42   | -0.1 (-1.2, 1.0)              | 0.86   | 0.7 (-1.2, 2.5)           | 0.47   |
| Social functioning              | 0.5 (-0.7, 1.8)                   | 0.39   | 0.6 (-0.4, 1.6)               | 0.26   | -0.04 (-1.6, 1.6)         | 0.97   |
| Role emotional                  | 0.3 (-1.0, 1.5)                   | 0.69   | -0.3 (-1.3, 0.7)              | 0.56   | 0.6 (-1.1, 2.2)           | 0.50   |
| Mental health                   | -0.2 (-1.5, 1.1)                  | 0.76   | 0.2 (-0.9, 1.3)               | 0.67   | -0.4 (-2.2, 1.3)          | 0.62   |
| Gait speed (m/sec) <sup>b</sup> | -0.01 (-0.04, 0.03)               | 0.77   | -0.04 (-0.07, -0.02)          | 0.002  | 0.04 (-0.01, 0.08)        | 0.12   |

CI: confidence interval; PCS: Physical Component Summary score of SF-12; MCS: Mental Component Summary score of SF-12

All analyses adjusted for baseline body mass index, education, morbidities or chronic conditions, and days between outcome measures

<sup>a</sup>n=189 for female participants with hip replacement and n=327 for female controls

<sup>b</sup>n=139 for male participants with hip replacement and n=245 for male controls

**Table S3. Baseline, follow-up, and changes in health status and gait speed in participants with hip replacement and age- and sex-matched controls excluding participants with self-reported joint replacement prior to ASPREE trial**

|                     | <b>Participants with hip replacement<br/>N=274</b> |                        |                                      | <b>Age- and sex-matched controls<br/>N=543</b> |                        |                                      | <b>Difference between groups</b>     |                |
|---------------------|----------------------------------------------------|------------------------|--------------------------------------|------------------------------------------------|------------------------|--------------------------------------|--------------------------------------|----------------|
|                     | Baseline<br>(preoperative)<br>Mean (SD)            | Follow-up<br>Mean (SD) | Change<br>Mean (95% CI) <sup>¶</sup> | Baseline<br>(study entry)<br>Mean (SD)         | Follow-up<br>Mean (SD) | Change<br>Mean (95% CI) <sup>¶</sup> | Change<br>Mean (95% CI) <sup>¶</sup> | P <sup>¶</sup> |
| PCS                 | 39.9 (11.1)                                        | 45.0 (10.5)            | 5.0 (3.9, 6.1)                       | 48.6 (8.6)                                     | 48.5 (8.9)             | 0.1 (-0.6, 0.9)                      | 4.9 (3.6, 6.2)                       | <0.001         |
| MCS                 | 56.7 (8.0)                                         | 55.6 (6.8)             | -1.5 (-2.4, -0.5)                    | 55.7 (7.2)                                     | 55.8 (6.7)             | 0.1 (-0.6, 0.7)                      | -1.5 (-2.7, -0.3)                    | 0.01           |
| Physical function   | 40.8 (11.1)                                        | 44.5 (11.4)            | 3.8 (2.6, 5.0)                       | 48.0 (9.7)                                     | 48.1 (10.0)            | 0.3 (-0.6, 1.1)                      | 3.6 (2.1, 5.0)                       | <0.001         |
| Role physical       | 44.3 (9.8)                                         | 47.4 (9.4)             | 2.8 (1.7, 3.9)                       | 49.9 (8.1)                                     | 50.0 (8.3)             | 0.3 (-0.5, 1.0)                      | 2.6 (1.2, 3.9)                       | <0.001         |
| Bodily pain         | 40.3 (10.8)                                        | 47.2 (10.7)            | 6.7 (5.3, 8.0)                       | 50.6 (9.3)                                     | 50.5 (9.5)             | 0.002 (-0.9, 0.9)                    | 6.7 (5.0, 8.3)                       | <0.001         |
| General health      | 49.4 (9.1)                                         | 50.8 (9.0)             | 1.1 (0.1, 2.1)                       | 52.3 (7.2)                                     | 52.1 (7.8)             | -0.1 (-0.8, 0.6)                     | 1.2 (-0.02, 2.4)                     | 0.05           |
| Vitality            | 51.6 (9.5)                                         | 52.8 (8.4)             | 1.0 (-0.1, 2.1)                      | 55.1 (8.3)                                     | 54.7 (8.0)             | -0.2 (-1.0, 0.6)                     | 1.2 (-0.1, 2.5)                      | 0.07           |
| Social functioning  | 51.3 (9.2)                                         | 52.5 (7.7)             | 0.6 (-0.4, 1.6)                      | 53.6 (7.1)                                     | 54.1 (6.3)             | 0.4 (-0.3, 1.1)                      | 0.2 (-1.0, 1.4)                      | 0.75           |
| Role emotional      | 50.4 (8.7)                                         | 50.7 (7.7)             | 0.2 (-0.9, 1.2)                      | 51.8 (6.7)                                     | 51.7 (7.5)             | -0.1 (-0.9, 0.6)                     | 0.3 (-1.0, 1.6)                      | 0.66           |
| Mental health       | 54.2 (7.9)                                         | 54.4 (7.2)             | -0.1 (-1.1, 1.0)                     | 55.0 (7.9)                                     | 55.2 (7.7)             | 0.3 (-0.4, 1.1)                      | -0.4 (-1.7, 0.9)                     | 0.57           |
| Gait speed (m/sec)* | 0.95 (0.24)                                        | 0.94 (0.21)            | -0.01 (-0.04, 0.02)                  | 1.06 (0.22)                                    | 1.01 (0.22)            | -0.05 (-0.07, -0.03)                 | 0.04 (-0.001, 0.07)                  | 0.05           |

SD: standard deviation; CI: confidence interval; PCS: Physical Component Summary score of SF-12; MCS: Mental Component Summary score of SF-12

\*n=197 for participants with hip replacement and n=495 for controls

<sup>¶</sup>Adjusted for baseline body mass index, education, morbidities or chronic conditions, and days between outcome measures
